# Supplementary material for: Computational determination of coordination structure impact on adsorption and acidity of pristine and sulfated MOF-808
Source: Royal Society of Chemistry journal article supplement (doi:10.1039/d1ma00330e), 2021-01-01
Supplement: d1ma00330e1.pdf [file d1ma00330e1.pdf]

## Electronic Supplementary Information

### Computational Determination of Coordination Structure Impact on Adsorption and Acidity of Pristine and Sulfated MOF-808

Bo Yang,<sup>\*a</sup> Joshua I. Wheeler,<sup>a</sup> Brett Sorensen,<sup>a</sup> Robert Steagall,<sup>a</sup> Taylor Nielson,<sup>a</sup> Jianhua Yao,<sup>b</sup> Jose Mendez-Arroyo,<sup>\*b</sup> and Daniel H. Ess,<sup>\*a</sup>

<sup>a</sup>Department of Chemistry and Biochemistry, Brigham Young University, Provo, Utah 84602, United States

<sup>b</sup>Phillips 66, Bartlesville, Oklahoma 74003, United States

#### AUTHOR INFORMATION

##### Corresponding Author

\*E-mail: [dhe@chem.byu.edu](mailto:dhe@chem.byu.edu)

\*E-mail: [b.yang3227@gmail.com](mailto:b.yang3227@gmail.com)

\*E-mail: [Jose.E.Mendez-Arroyo@p66.com](mailto:Jose.E.Mendez-Arroyo@p66.com)

#### TABLE OF CONTENTS

|                                                                                          |    |
|------------------------------------------------------------------------------------------|----|
| 1. Additional computational details                                                      | S2 |
| 2. Summary of optimized MOF-808 models                                                   | S2 |
| 3. Summary of optimized sulfated MOF-808 models                                          | S3 |
| 4. Additional discussion on ensemble-averaged proton affinities                          | S4 |
| 5. Additional correlation between deprotonation energy and Zr-O bond dissociation energy | S4 |

## 1. Additional computational details

Periodic models were optimized in vacuum to better than 0.003 Å for atom displacement and 0.00045 au for the forces. Cluster models were optimized in vacuum to better than 0.0018 Å for the atom displacement and 0.00045 au for the forces. Frequency analysis were performed for selected cluster models at 298.15 K and 1 atom.

The geometric surface areas of the MOFs were computed using the *RASPA* program in which the surface area is determined based on the overlap between probe (Ar) and framework atoms.<sup>1</sup>

## 2. Summary of optimized MOF-808 models

**Table S1.** Summary of optimized periodic MOF-808 models. Topologies are described in terms of sections and sub-sections of a Zr<sub>6</sub> node as indicated in Figure 2b in the main text. Averaged lattice constants ( $a = b = c$ ) are given in Å.

| Model | Zr1 - Zr2          |         | Zr2 - Zr3          |         | Zr3 - Zr4          |         | Zr4 - Zr5          |         | Zr5 - Zr6          |         | Zr6 - Zr1          |         | H <sub>2</sub> O<br>in pore | $a = b = c$ |
|-------|--------------------|---------|--------------------|---------|--------------------|---------|--------------------|---------|--------------------|---------|--------------------|---------|-----------------------------|-------------|
|       | $\alpha$           | $\beta$ |                             |             |
| I     | $\mu^2$ formate    |         | —                           | 35.282      |
| II    | $\mu^2$ formate    |         | $\kappa^1$ formate | —       | $\mu^2$ formate    |         | $\kappa^1$ formate | —       | $\mu^2$ formate    |         | $\kappa^1$ formate | —       | —                           | 35.131      |
| III   | $\mu^2$ formate    |         | $\kappa^1$ formate | —       | —                           | 35.000      |
| IV    | $\mu^2$ formate    |         | hydroxo            | —       | —                           | 35.270      |
| V     | $\mu^2$ formate    |         | hydroxo            | aqua    | —                           | 35.391      |
| VI    | $\mu^2$ formate    |         | aqua               | aqua    | —                           | 35.411      |
| VII   | $\kappa^1$ formate | —       | —                           | 34.947      |
| VIII  | $\kappa^2$ formate | —       | —                           | 35.362      |
| IX    | $\mu^2$ formate    |         | 1                           | 35.278      |
| X     | $\mu^2$ formate    |         | 2                           | 35.274      |
| XI    | $\mu^2$ formate    |         | 3                           | 35.253      |
| XII   | $\mu^2$ formate    |         | 4                           | 35.222      |
| XIII  | $\mu^2$ formate    |         | 5                           | 35.186      |
| XIV   | $\mu^2$ formate    |         | 6                           | 35.132      |
| XV    | $\kappa^1$ formate | aqua    | —                           | 35.529      |
| XVI   | $\kappa^1$ formate | aqua    | 5                           | 35.298      |
| XVII  | $\kappa^1$ formate | aqua    | $\mu^2$ formate    |         | $\kappa^1$ formate | aqua    | $\mu^2$ formate    |         | $\kappa^1$ formate | aqua    | $\mu^2$ formate    |         | —                           | 35.331      |
| XVIII | aqua               | hydroxo | —                           | 35.409      |

### 3. Summary of optimized sulfated MOF-808 models

**Table S2.** Topologies of S-MOF-808 models. Topologies are described in terms of sections and sub-sections of a  $Zr_6$  node shown in Figure S1 below. Ligands that occupy two columns are bridging across two Zr atoms. Averaged proton affinity (PA) are given in kcal/mol. The cluster model of Model K was constructed based on model A, and the PA value for A was estimated based on single point calculations.

| Model | Zr1                |                           | Zr2      |         | Zr3              |         | Zr4                |                  | Zr5              |         | Zr6      |         | PA     |
|-------|--------------------|---------------------------|----------|---------|------------------|---------|--------------------|------------------|------------------|---------|----------|---------|--------|
|       | $\alpha$           | $\beta$                   | $\alpha$ | $\beta$ | $\alpha$         | $\beta$ | $\alpha$           | $\beta$          | $\alpha$         | $\beta$ | $\alpha$ | $\beta$ |        |
| A     | $\eta^2$ sulfate   |                           | aqua     | aqua    | aqua             | hydroxo | $\eta^2$ sulfate   |                  | aqua             | aqua    | hydroxo  | aqua    | 315.89 |
| B     | $\eta^2$ sulfate   |                           | aqua     | aqua    | hydroxo          | aqua    | hydroxo            | aqua             | hydroxo          | aqua    | hydroxo  | aqua    | 326.53 |
| C     | $\eta^2$ sulfate   |                           | aqua     | aqua    | $\eta^2$ sulfate |         | aqua               | aqua             | $\eta^2$ sulfate |         | aqua     | aqua    | 308.84 |
| D*    | $\eta^2$ sulfate   |                           | aqua     | aqua    | hydroxo          | aqua    | $\eta^2$ sulfate   |                  | aqua             | aqua    | aqua     | aqua    | 255.14 |
| E     | hydroxo            | $\eta^2$ hydrogen sulfate | hydroxo  |         | aqua             | aqua    | aqua               | $\eta^2$ sulfate | hydroxo          |         | aqua     | aqua    | 316.91 |
| F**   | $\eta^2$ sulfate   |                           | aqua     | aqua    | $\eta^2$ sulfate |         | $\eta^2$ sulfate   |                  | aqua             | aqua    | hydroxo  | aqua    | 363.38 |
| G     | $\eta^2$ sulfate   |                           | aqua     | aqua    | hydroxo          | aqua    | aqua               | hydroxo          | $\eta^2$ sulfate |         | aqua     | aqua    | 317.58 |
| H**   | $\eta^2$ sulfate   |                           | aqua     | aqua    | aqua             | hydroxo | $\eta^2$ sulfate   |                  | hydroxo          | aqua    | hydroxo  | aqua    | 374.27 |
| J     | $\eta^2$ sulfate   |                           | aqua     | aqua    | $\eta^2$ sulfate |         | $\eta^2$ sulfate   |                  | aqua             | aqua    | aqua     | aqua    | 306.37 |
| K***  | $\eta^2$ bisulfate |                           | hydroxo  | aqua    | aqua             | hydroxo | $\eta^2$ bisulfate |                  | aqua             | hydroxo | aqua     | hydroxo | 309.79 |

\*positively charged; \*\*negatively charged; \*\*\*based on single point calcula

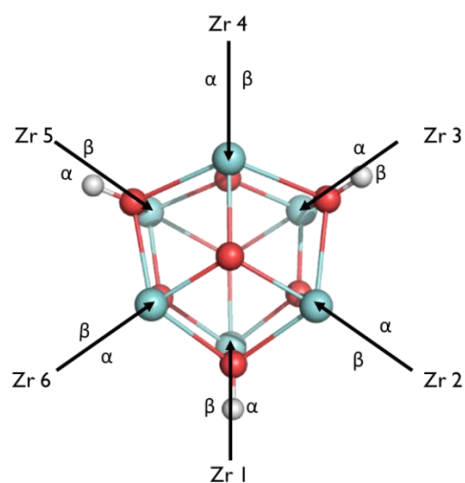

**Figure S1.** Bare  $Zr_6$  node with binding ligands and linkers removed for clarity. Each Zr atom is assigned section  $\alpha$  and  $\beta$ . For S-MOF-808 models, each section can be occupied by sulfate, water, or hydroxo ligands. The different arrangements of ligands give different topologies (i.e. different models) that are summarized in Table S2 above.

#### 4. Additional discussion on ensemble-averaged proton affinities

The ensemble-averaged proton affinities (<PAs>) were calculated for three hydrogens. H1 and H2 of model **A** as shown in Figure 9 of the main text and H23 of model **XIV** (see above sections for description of this model). For H1, a total of 15 MOF-H equilibrium states were considered. These equilibrium states were constructed by protonating suitable ligands, including hydroxo,  $\mu$ -oxo, and sulfate, around the Zr6 node using proton H1. The same procedure was applied to atom H2 of model **A** and atom H23 of model **XIV** with a total of 15 and 10 equilibrium states considered, respectively.

For H1, H2, and H23, the computed <PAs> are 317.05, 317.19, and 341.55 kcal/mol, respectively. The PAs as defined in Equation 1 in the main text are 317.61, 317.61, and 341.55 kcal/mol for H1, H2, and H23, respectively. The <0.6 kcal/mol differences between <PA> and PA demonstrate that not considering MOF-H equilibrium states is an accurate approximation.

#### 5. Additional correlation between deprotonation energy and Zr–O bond dissociation energy

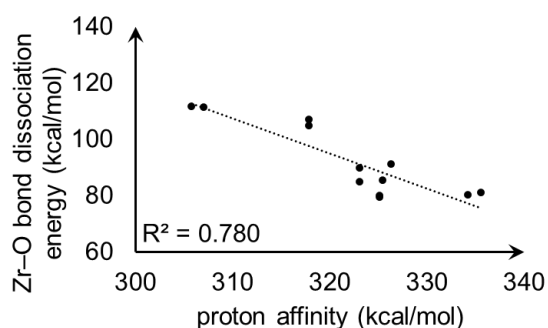

**Figure S2.** Correlation between deprotonation energy (kcal/mol) and heterolytic Zr–O bond dissociation energy (kcal/mol) in model **B**.

#### References

1. D. Dubbeldam, S. Calero, D. E. Ellis and R. Q. Snurr, *Mol. Simul.*, 2016, **42**, 81–101.
